# Supplementary material
Source: PubMed Central journal article supplement (PMC11108449)
Supplement: 18_2015_2033_MOESM1_ESM.pdf [file 18_2015_2033_MOESM1_ESM.pdf]

# **Gla-rich protein is involved in the cross-talk between calcification and inflammation in osteoarthritis**

## **Cellular and Molecular Life Sciences**

Sofia Cavaco, Carla S. B. Viegas, Marta S. Rafael, Acácio Ramos, Joana Magalhães, Francisco Blanco, Cees Vermeer, Dina C. Simes ‡

‡Corresponding author:

Dina C. Simes, Centre of Marine Sciences (CCMAR), University of Algarve, Campus de Gambelas, 8005-139 Faro, Portugal

Tel: +351 289 800100 Fax: +351 289 800069 E-mail: dsimes@ualg.pt

## Online Resource 1

**Table 1** Gene-specific primers used in this study

| Gene     | Primer name | Sequence (5' to 3')         |
|----------|-------------|-----------------------------|
| 18S      | 18S_F       | GGAGTATGGTTGCAAAGCTGA       |
|          | 18S_R       | ATCTGTCAATCCTGTCCGTGT       |
| OC       | OC_F        | CAGCGAGGTAGTGAAGAGACCCAGG   |
|          | OC_R        | AGGGCAAGGGGAAGAGGAAAGAAGG   |
| COMP     | COMP_F      | CTGCCTTCAATGGCGTGGACTTCG    |
|          | COMP_R      | GGAAGGGGTTTCGCTGCCAATAC     |
| Col2a1   | Col2a1_F    | CCTCGTGGGTCCCAGGGGTGAA      |
|          | Col2a1_R    | TGAAGACCTGGAGGGCCCTGTGCG    |
| Col10a1  | Col10a1_F   | AGCTGCCAAGGCACCATCTCCA      |
|          | Col10a1_R   | AGTGGGCCTTTTATGCCTGTGGGC    |
| MMP13    | MMP13_F     | AACCGTATTGTTTCGCGTCATGCCAG  |
|          | MMP13_R     | GATAGCTCTTCTTCCCCTACCCCGC   |
| Vimentin | Vimentin_F  | TGCGTCTCTGGCACGTCTTGACCT    |
|          | Vimentin_R  | AGGGCGTCATTGTTCCGGTTGGCA    |
| CD68     | CD68_F      | ACAGGACAACCACCACAGGCACCA    |
|          | CD68_R      | GTGGCAGTGCTGTTGCTTGTGGGA    |
| GRP-F1   | GRPF1_F     | GTCCCCCAAGTCCCGAGATGAGG     |
|          | GRPF1_R     | CCTCCACGAAGTTCTCAAATTCATTCC |
| MGP      | MGP_F       | TGGAGGCTGGCACCTGATTTTG      |
|          | MGP_R       | AAAAGGGGTGCAGCCAGACAAG      |
| GGCX     | GGCX_F      | TTACACAGAGTCGGCGATGGAAGGAT  |
|          | GGCX_R      | TACTGGATGTCAGGTCTGCGAAA     |
| VKORC1   | VKORC1_F    | AGGGCAAGGCTAAGAGGCACTGAG    |
|          | VKORC1_R    | CTGGGCAATGGAAAGAGCTTTGGAGAC |
| Osx      | Osx_F       | CAAGGTGTATGGCAAGGCTTCGCA    |
|          | Osx_R       | TGCTGGCGAGGCAGAAGGTCGGGGCGT |
| OPN      | OPN_F       | ACGGACCTGCCAGCAACCGAAGT     |
|          | OPN_R       | TACTGGATGTCAGGTCTGCGAAA     |
| COX2     | COX2_F      | TGGTCTGGTGCTGGTCTGATGATGT   |
|          | COX2_R      | GCCTGCTTGTCTGGAACAACCTGCTCA |

Online Resource 2

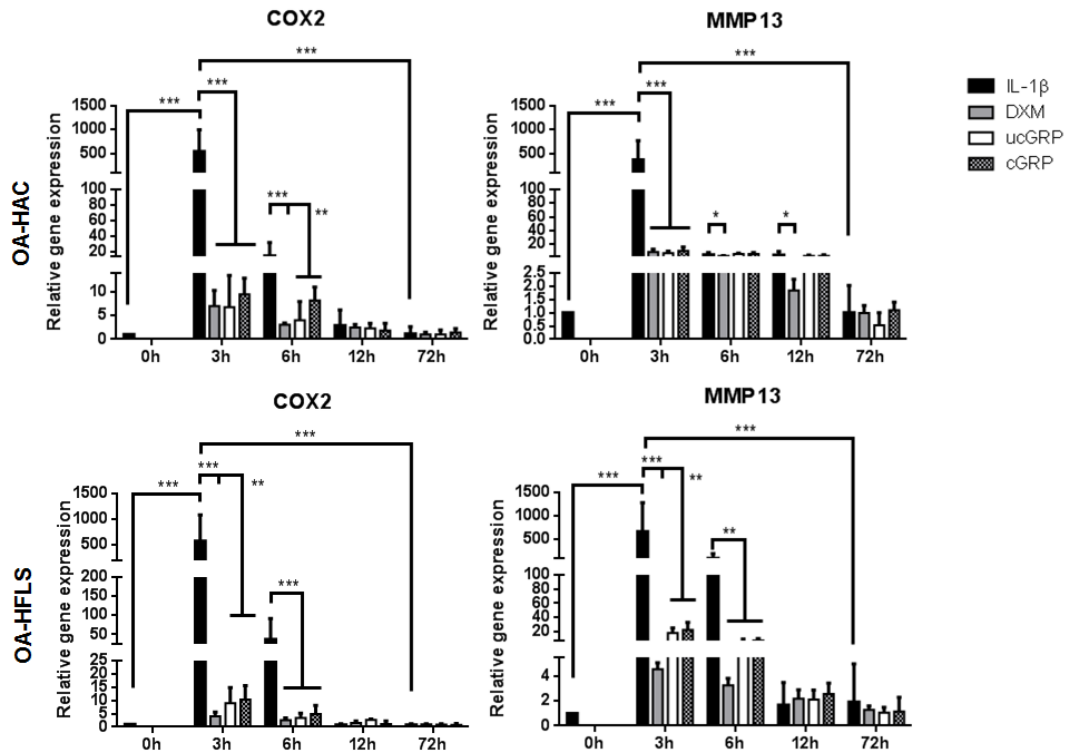

**Online Resource 1** Effect of GRP in OA-derived chondrocytes and synoviocytes under inflammatory conditions, and comparison with dexamethasone (DXM). Gene expression of COX2 and MMP13 in OA-HAC and OA-HFLS cells pre-treated with 500 ng/mL of ucGRP or cGRP or 2  $\mu$ M DXM followed by IL-1 $\beta$  stimulation (5 ng/mL) during 72 h. Cells without the pre-treatment were also analysed (IL-1 $\beta$ ). Control corresponds to cells left untreated. Values are relative to the reference sample (0 h). Data is representative of three independent experiments. Two-way Anova and multiple comparisons were achieved with the Tukey's test. Statistical significance was defined as  $P \leq 0.05$  (\*),  $P \leq 0.005$  (\*\*) and  $P \leq 0.0005$  (\*\*\*)
